# Supplementary material for: BIQ: A method for searching circular RNAs in transcriptome databases by indexing backsplice junctions
Source: bioRxiv or medRxiv preprint supplement (doi:10.1101/556993), 2019-02-25

# Supplementary Materials

## **BIQ: A method for searching circular RNAs in transcriptome databases by indexing backsplice junctions**

**Peter Menzel<sup>a,✉</sup> and Irmtraud M Meyer<sup>a,b</sup>**

<sup>a</sup>Berlin Institute for Medical Systems Biology, Max Delbrück Center for Molecular Medicine, Robert-Rössle-Straße 10, 13125, Berlin

<sup>b</sup>Institute of Biochemistry, Thielallee 63, Freie Universität Berlin, 14195 Berlin, Germany

**Fig. 1.** Cumulative count of distinct BSJ  $k$ -mers in all SRA files from the (a) Drosophila and (b) ENCODE datasets.

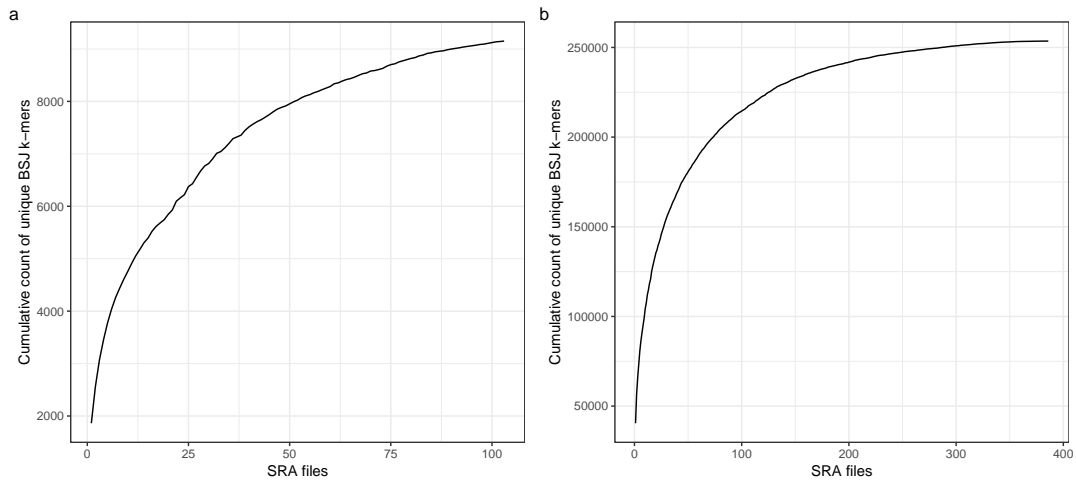

**Fig. 2.** Abundance of BSJ  $k$ -mers across all SRA files from the (a) Drosophila and (b) ENCODE datasets.

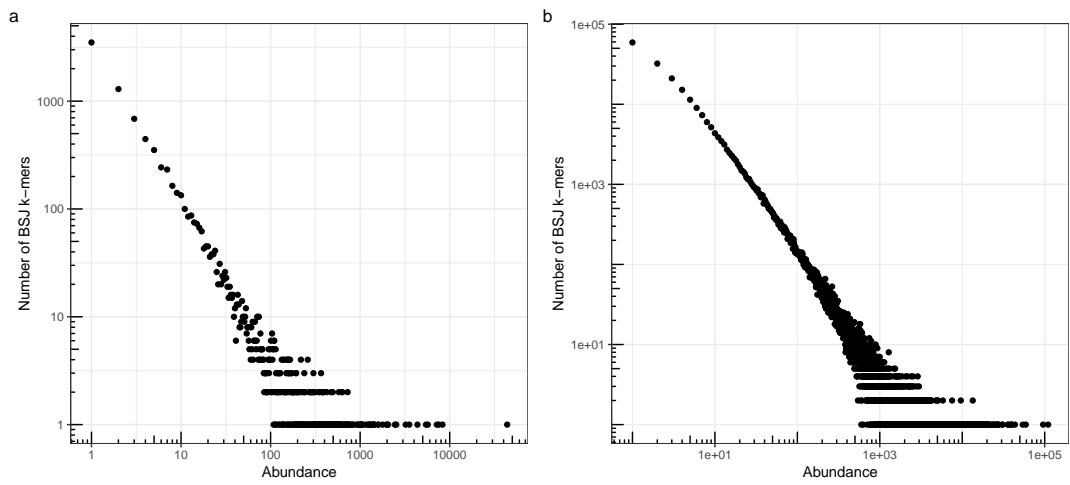

**Fig. 3.** Number of samples in which BSJ  $k$ -mers occur in (a) Drosophila and (b) ENCODE datasets.

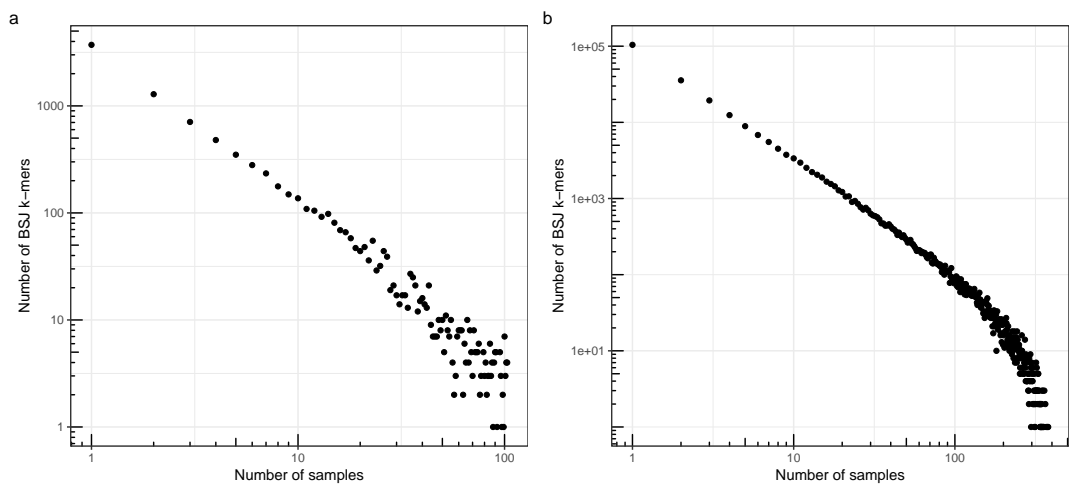

Fig. 4. Number of distinct observed BSJ *k*-mers (points) from *D. melanogaster* developmental transcriptomes and cumulative count of distinct BSJ *k*-mers (line)

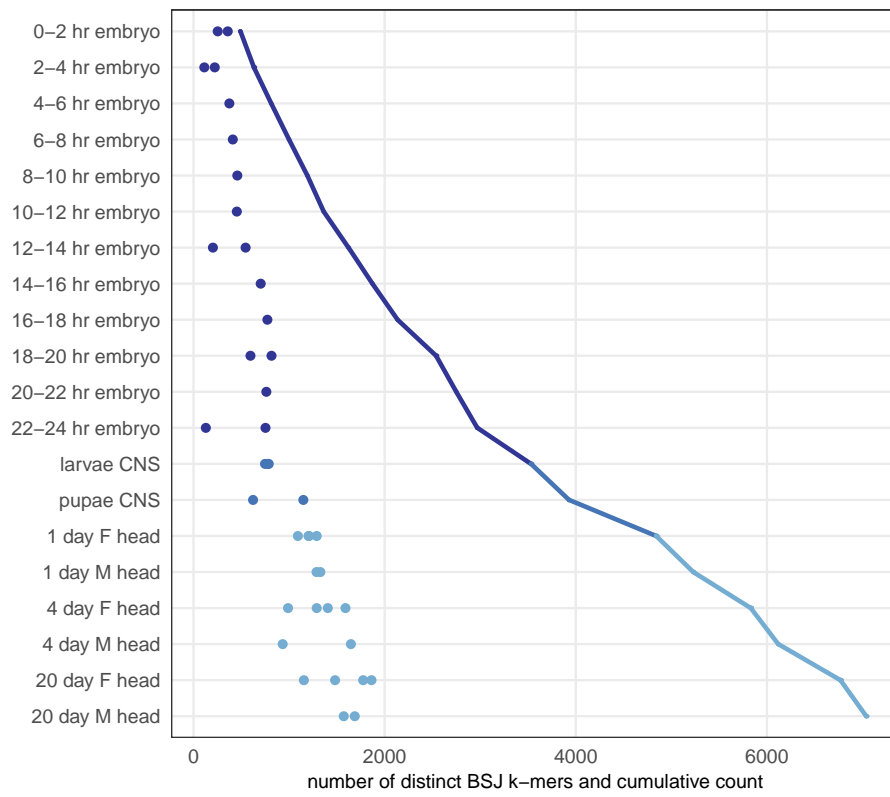

Fig. 5. Two-dimensional embedding of BSJ profiles of all ENCODE transcriptome datasets.

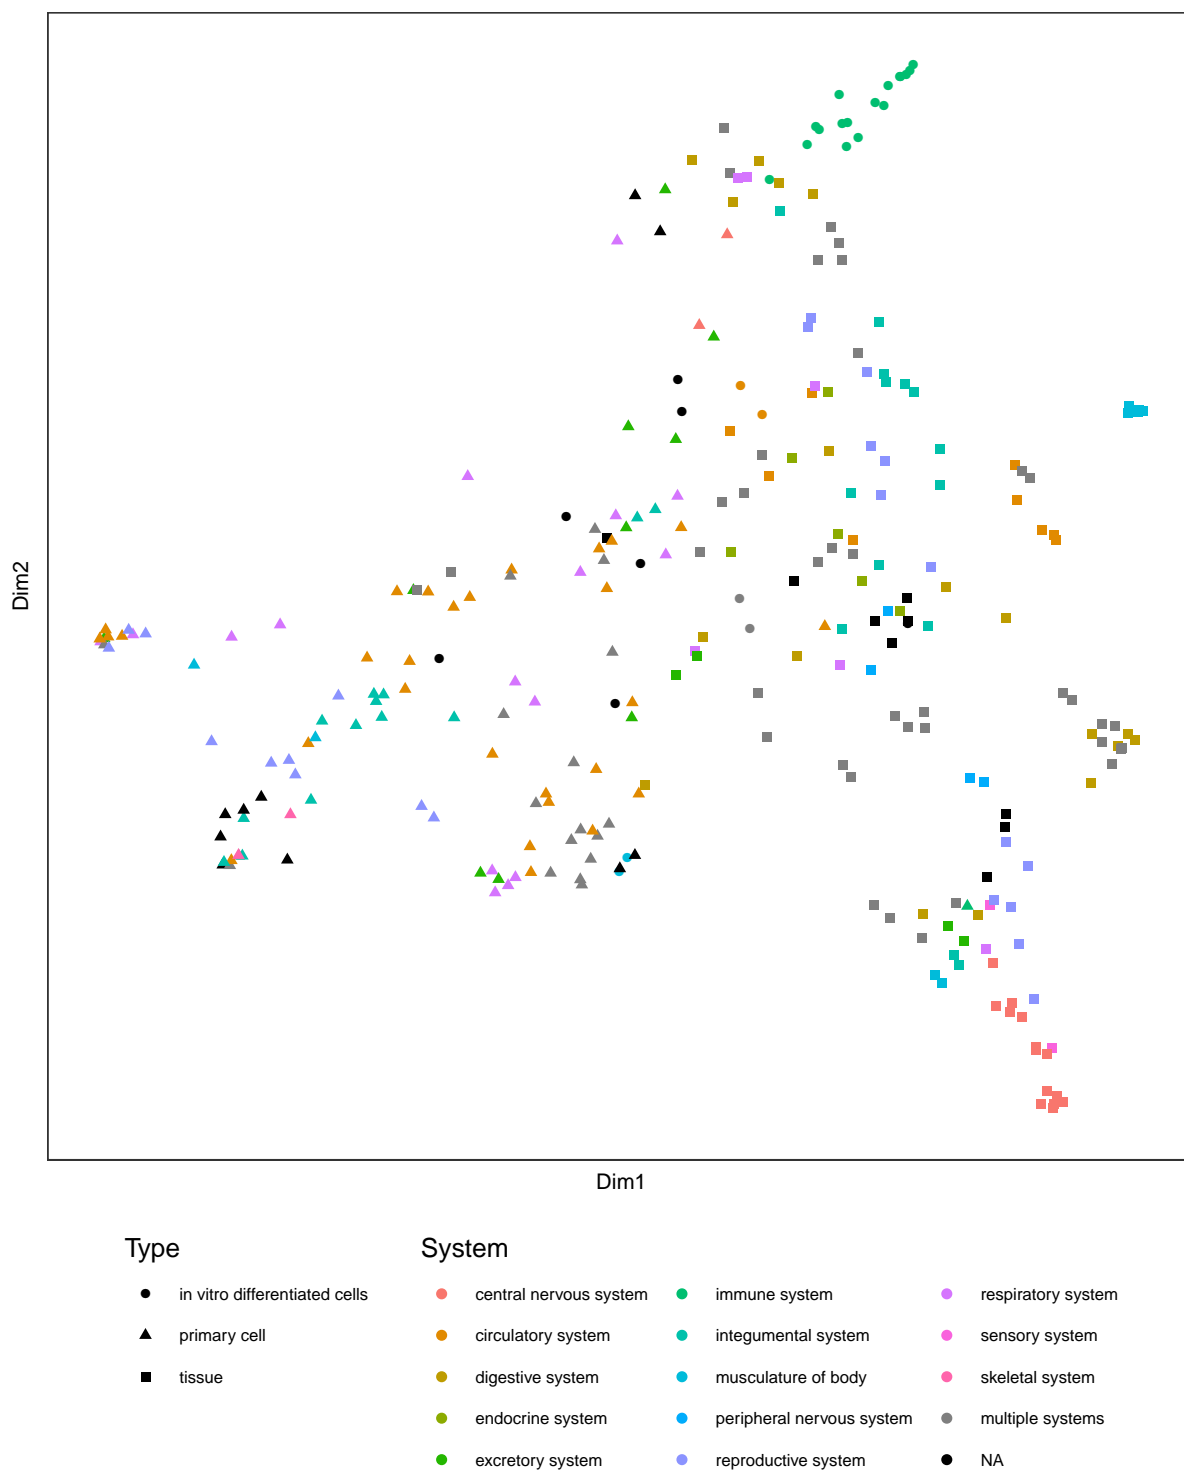

Supplement: Supplementary file [file media-1.pdf]
